# Supplementary material for: Geopolitical species revisited: genomic and morphological data indicate that the roundtail chub Gila robusta species complex (Teleostei, Cyprinidae) is a single species
Source: PeerJ journal article supplement (doi:10.7717/peerj.5605), 2018-09-27
Supplement: Fig_S1.pdf [file Fig_S1.pdf]

These, the types of Sela robusta  
B. & S., are cat. no. 246. They  
were reentered by error as 47983  
and attributed to nos. 276 + 277,  
which are codes! R.R. Miller  
(over) III: 1945

Nos 276 + 277 were attributed  
a type nos. of this species, by  
error, by Jordan + Evermann,  
1896: 227.
